# Supplementary material for: Morphometric Measurements and Muscle Atrophy Scoring as a Tool to Predict Body Weight and Condition of Horses
Source: MDPI journal article supplement (doi:10.3390/vetsci10080515), 2023-08-09
Supplement: s1 [file s1]

Supplementary Table S1 Descriptive statistics of data of the body weight (BW) and of the morphometric measurements of the horses

| Variable                | n  | Span        | Mean  | Median | SD    |
|-------------------------|----|-------------|-------|--------|-------|
| BW all horses           | 40 | 381–633     | 512.7 | 513.3  | 66.96 |
| BW horses<br>< 18 years | 26 | 428–633     | 528   | 533.6  | 62.2  |
| BW horses<br>≥ 18 years | 14 | 381–557     | 473.8 | 464.0  | 59.08 |
| Hight at the withers    | 40 | 150–175     | 158   | 157    | 6.87  |
| Neck length             | 40 | 59–81.5     | 67.65 | 67.75  | 4.62  |
| Neck circumference      | 40 | 102–163     | 123.9 | 123.0  | 9.48  |
| Crest of the neck       | 40 | 2.5–12.0    | 4.58  | 4.00   | 1.99  |
| Chest circumference     | 40 | 172.5–209.0 | 188.6 | 189.2  | 9.06  |
| Abdomen circumference   | 40 | 187.5–234.0 | 209.4 | 209.2  | 10.93 |
| Flank circumference     | 40 | 175.0–233.0 | 198.6 | 199.0  | 12.94 |
| Cane circumference      | 40 | 18.5–27.0   | 21.35 | 20.75  | 2.22  |
| Body length             | 40 | 152–274     | 173.6 | 171.5  | 17.68 |
| Body circumference      | 40 | 375–433     | 399.5 | 398.0  | 15.27 |

n = number of horses

SD = standard deviation

BW in kg

All measurements in cm
