# Supplementary figures and images for: Morphometric Measurements and Muscle Atrophy Scoring as a Tool to Predict Body Weight and Condition of Horses
Source: MDPI journal article supplement (doi:10.3390/vetsci10080515), 2023-08-09

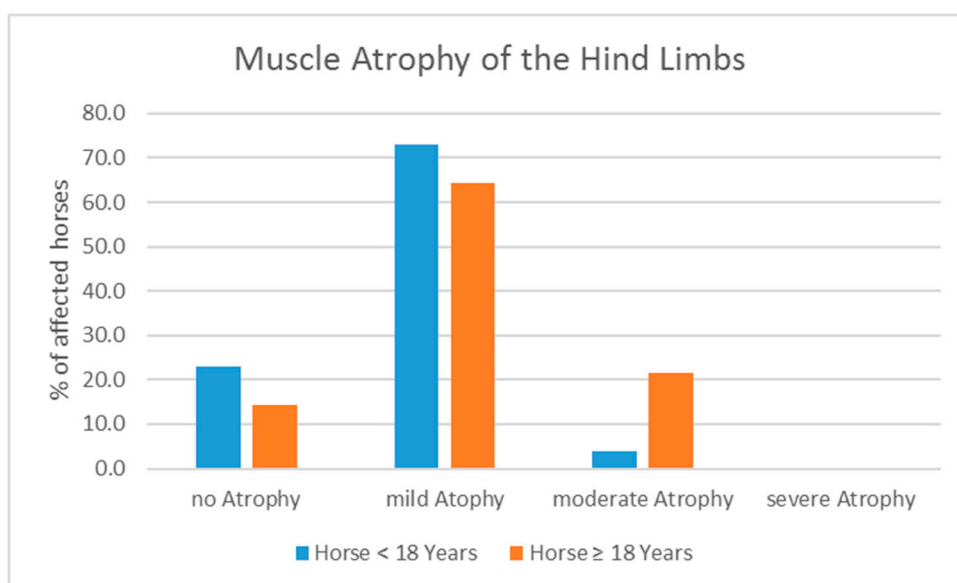

Supplementary Figure S2: Muscle Atrophy Scores of the hind limbs by two age groups

Supplement: s1 [file s1]

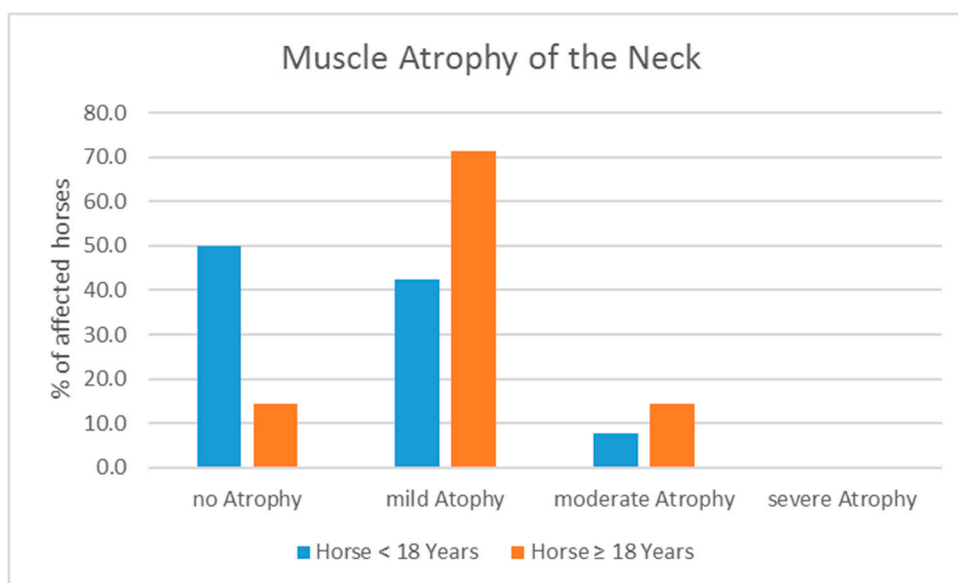

Supplementary Figure S1: Muscle Atrophy Scores of the neck by two age groups

Supplement: s1 [file s1]
